# Supplementary material for: Succinate Dehydrogenase Upregulation Destabilize Complex I and Limits the Lifespan of gas-1 Mutant
Source: PubMed Central journal article supplement (PMC3610896; doi:10.1371/journal.pone.0059493), 2013-03-28

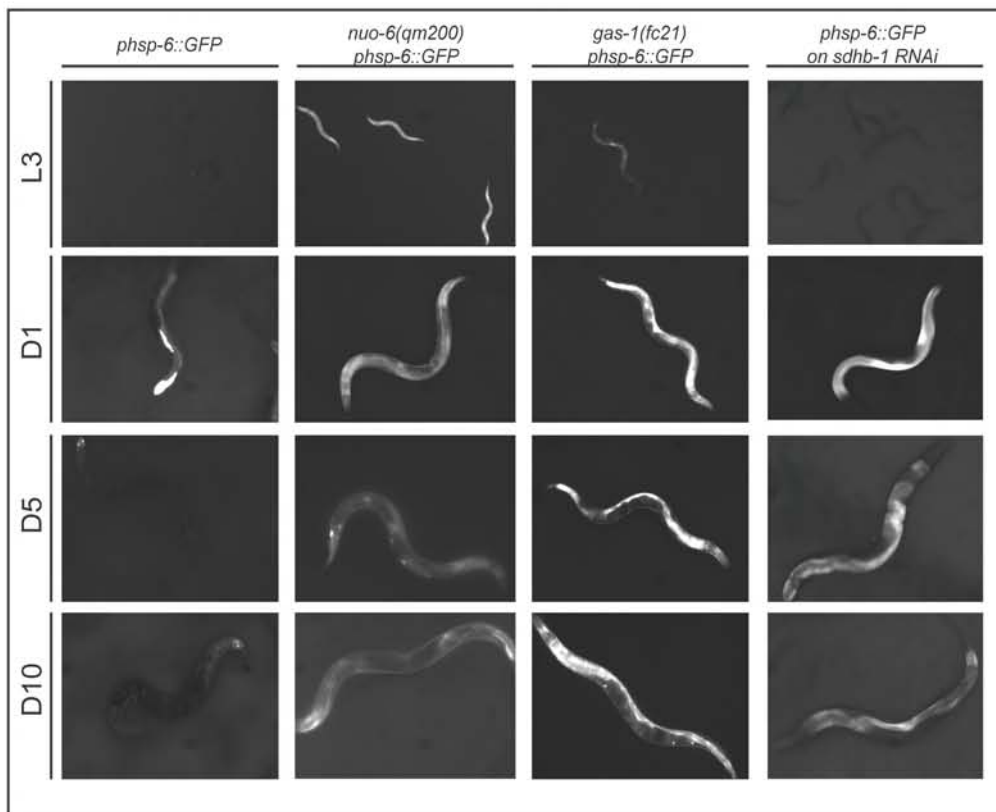

Supplement: pone.0059493.s003.pdf [file pone.0059493.s003.pdf]
